# Supplementary material
Source: PubMed Central journal article supplement (PMC5851414)
Supplement: ba009654-suppl2.pdf [file ba009654-suppl2.pdf]

**Supplemental Table 1: Genes and primers for Sanger sequencing.**

| <b>Gene</b>   | <b>Sense</b>                | <b>Antisense</b>           |
|---------------|-----------------------------|----------------------------|
| <i>STAT3</i>  | 5'CACTTGCCTCCTTGACTCTT'3    | 3'AACAGGGAGCCTTCTCTTG'5    |
| <i>KMT2C</i>  | 5'CACAGAAGGGTCATCAGAATCA'3  | 3'TGCCACCATCTCAACAAGAG'5   |
| <i>NOTCH2</i> | 5'TGTCCAAACTCTTGGGAACC'3    | 3'TGAGCCTTTGAAGCAGGAG'5    |
| <i>MKI67</i>  | 5'GCTCCTCCTTCACTTCTACTTTC'3 | 3'CATCAGGTCACACTCAGGAATC'5 |
| <i>DNMT3A</i> | 5'AGGAGTCCAGACCAAGAGTAG'3   | 3'GCTCTGTCTTGCCTCATTCA'5   |
